# Supplementary material
Source: PubMed Central journal article supplement (PMC4699446)

# Supplementary Figure 2

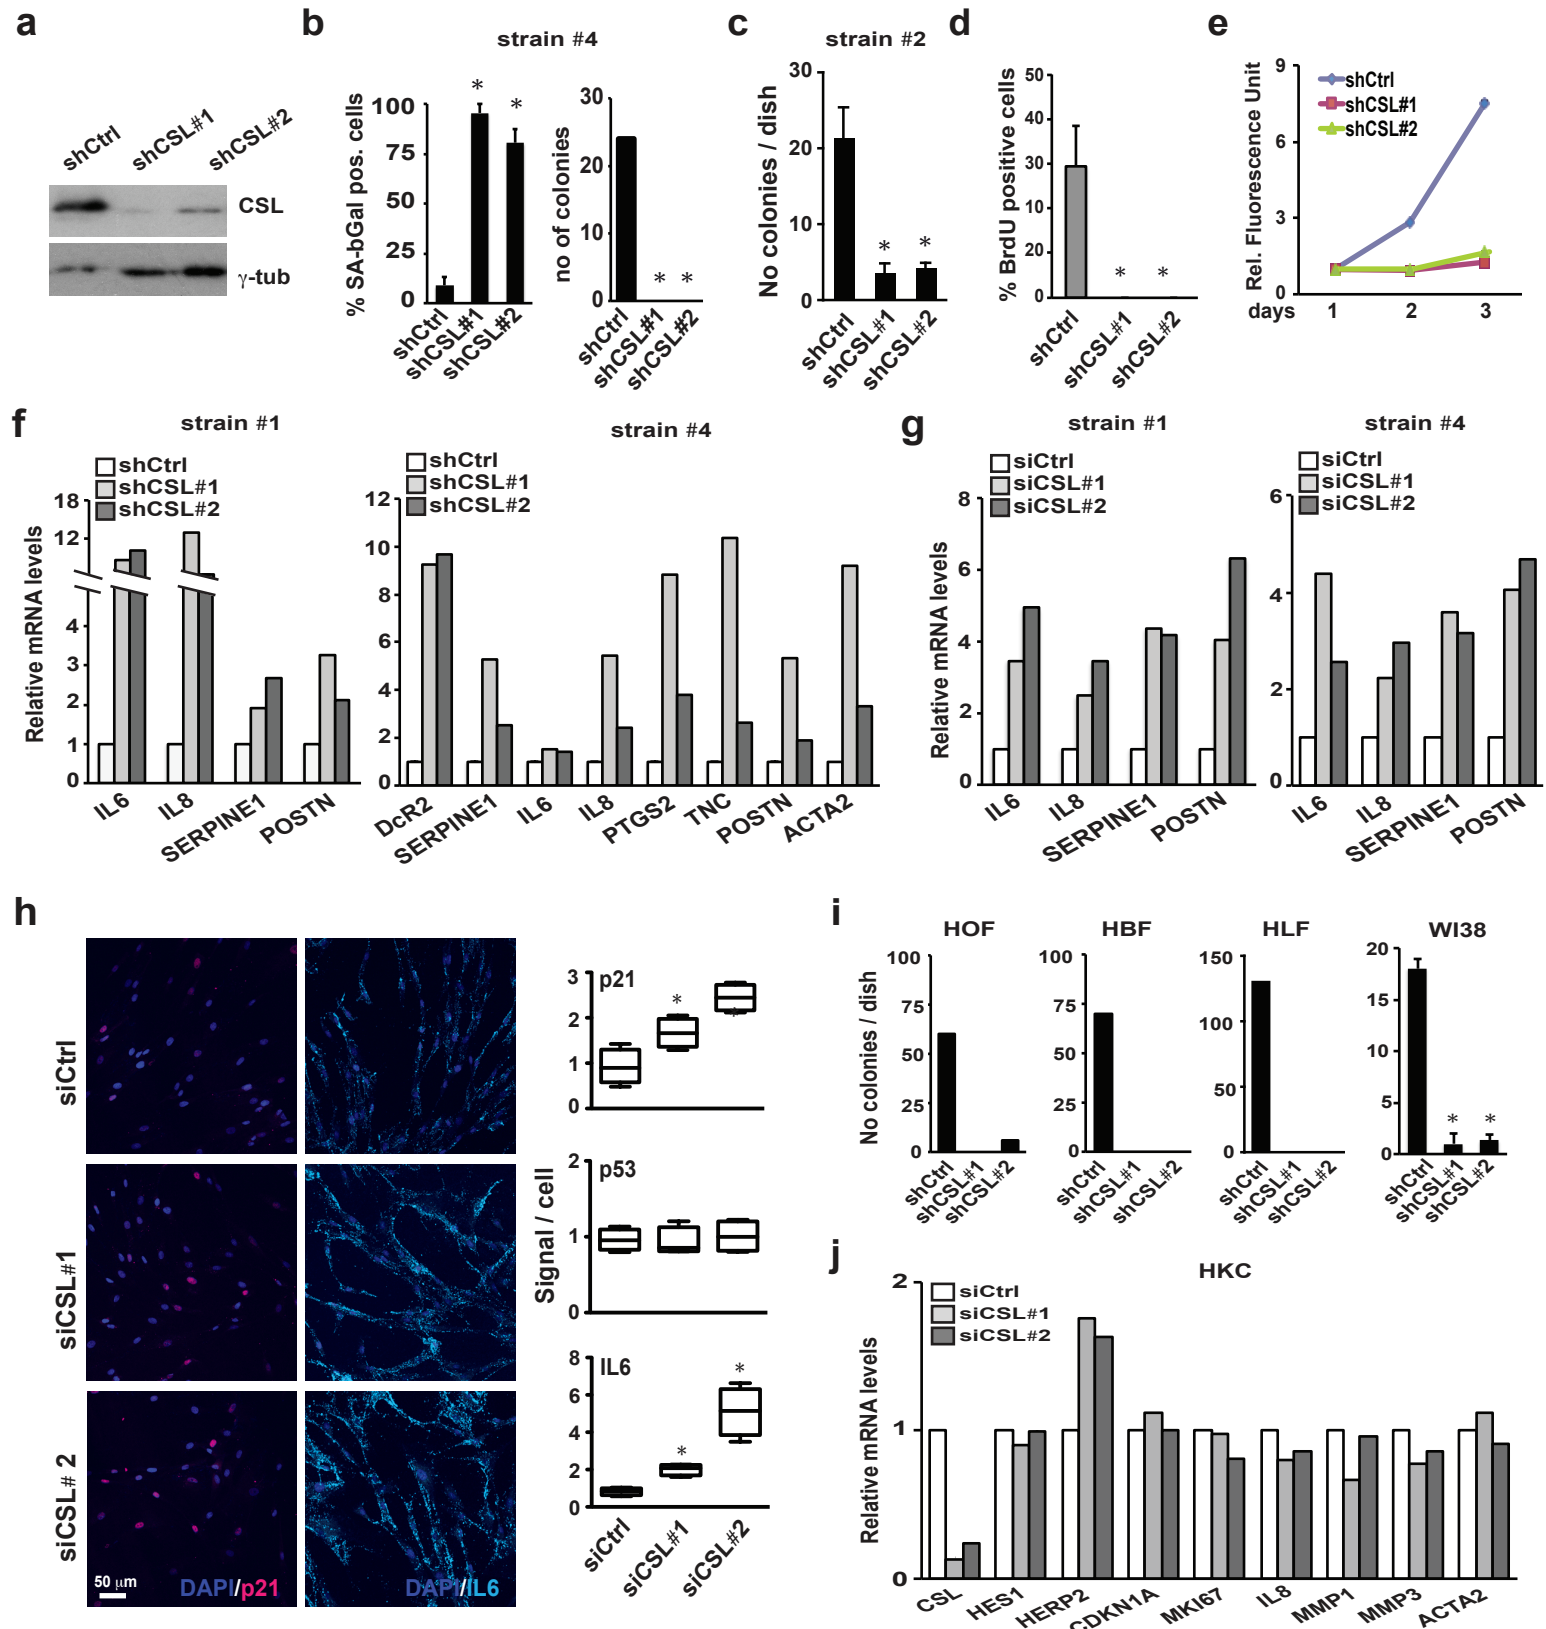

Supplement: NIHMS710198-supplement-2.pdf [file NIHMS710198-supplement-2.pdf]

# Supplementary Figure 3

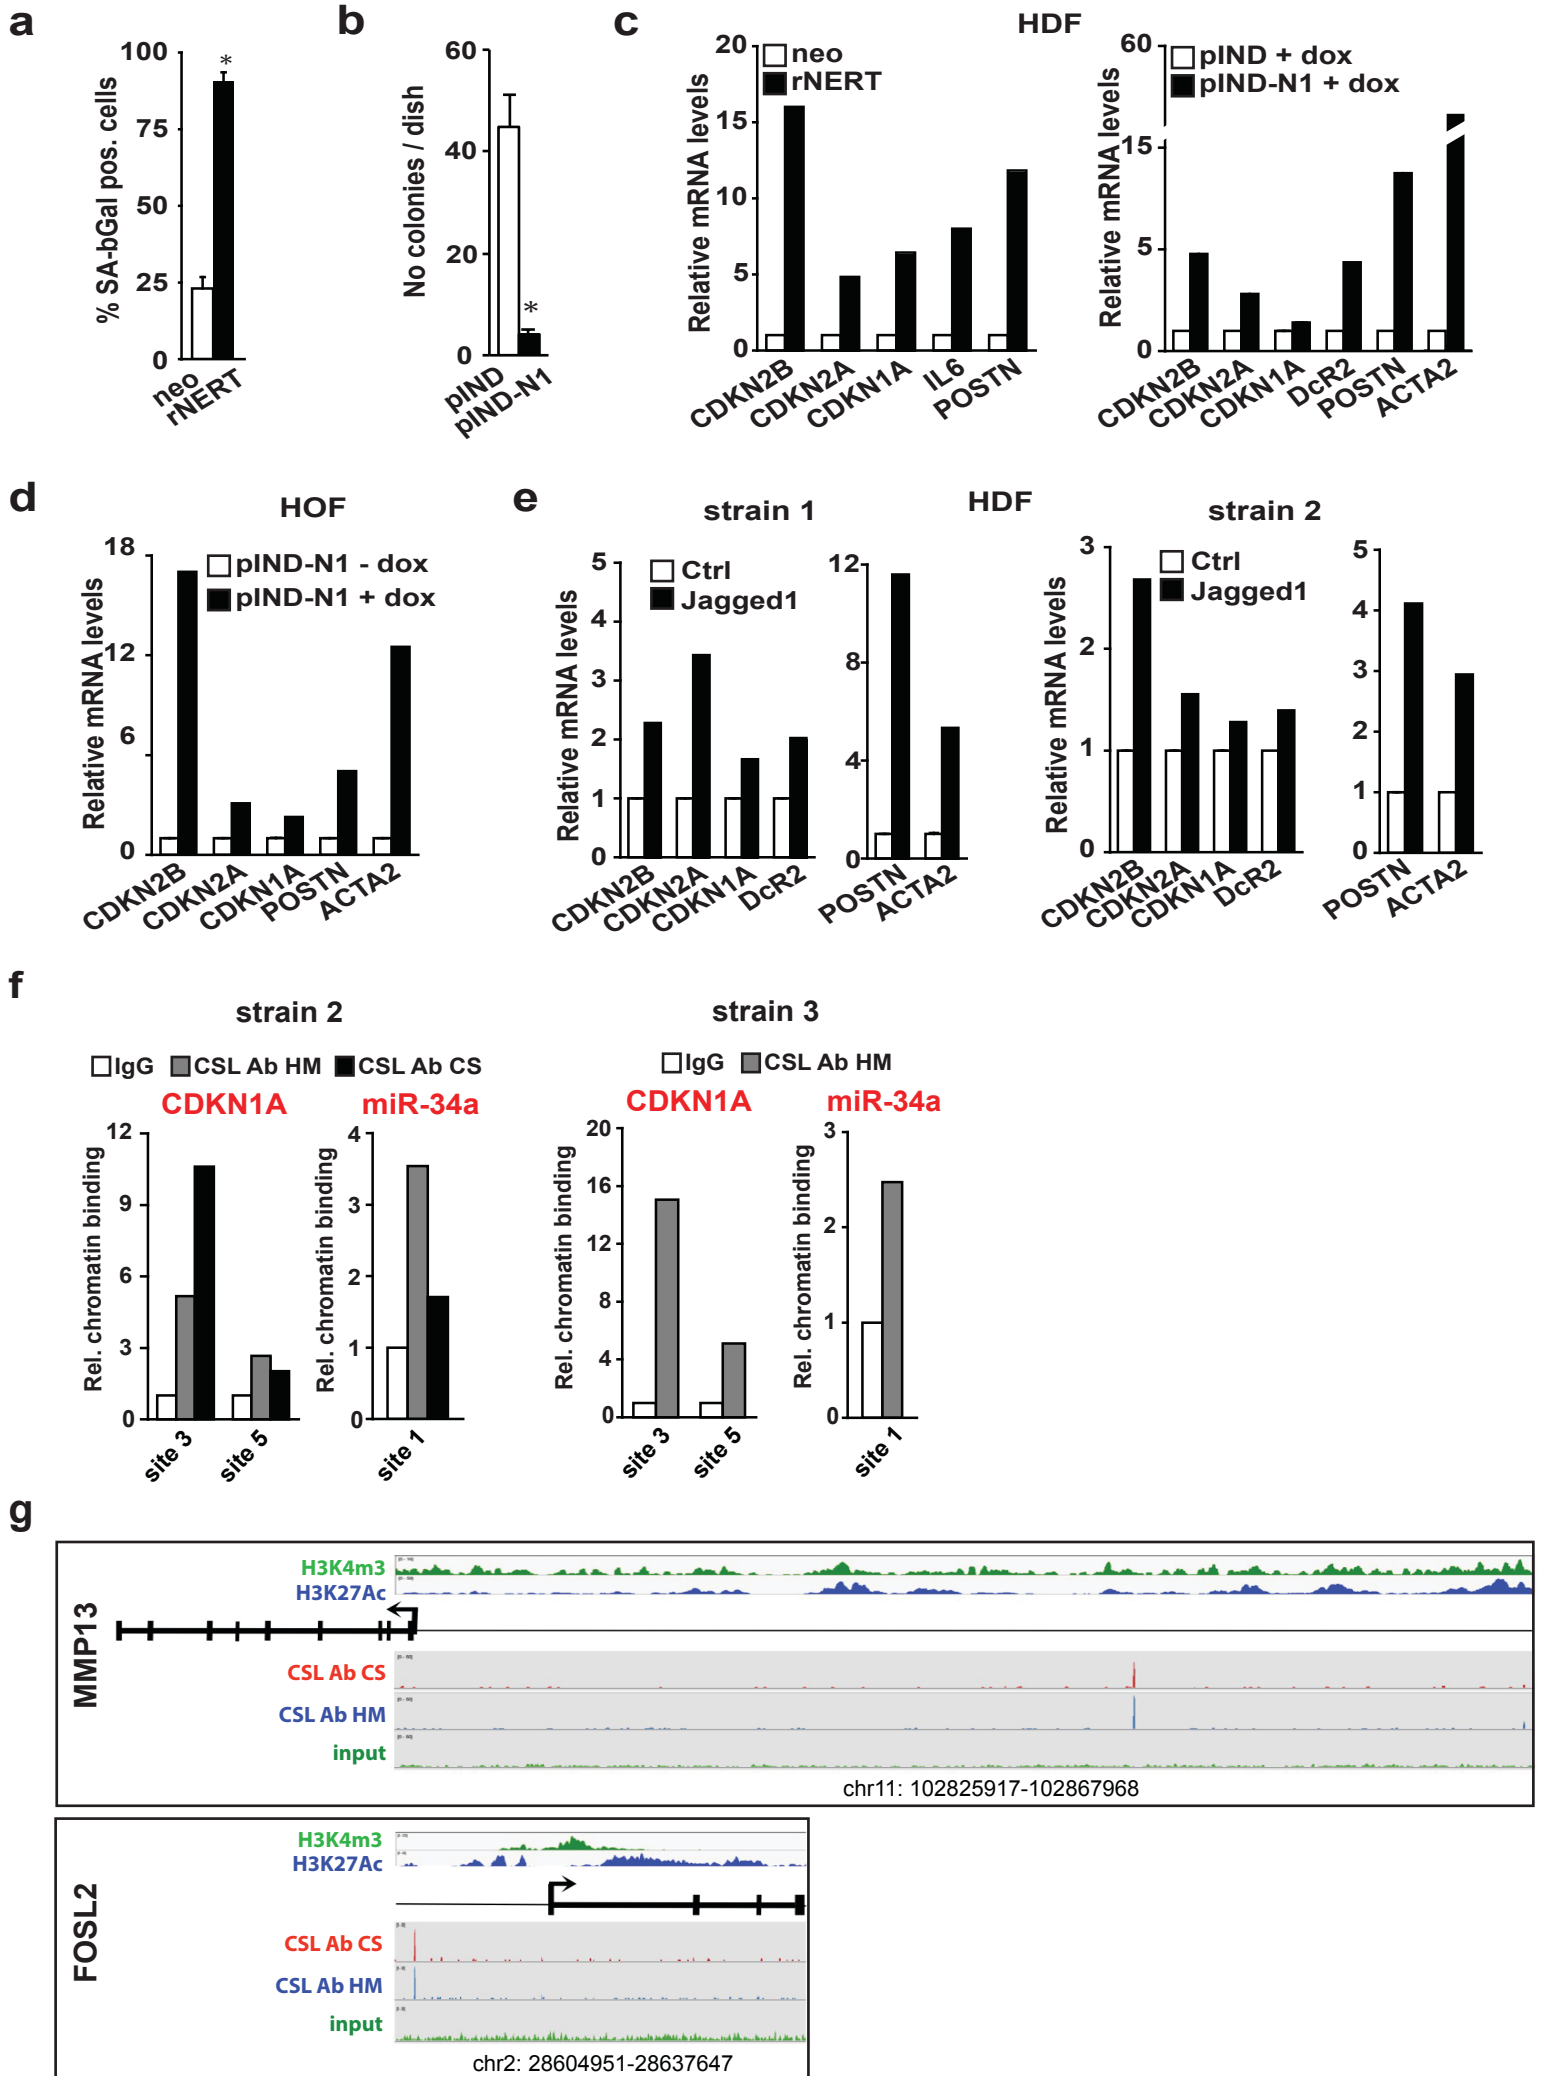

Supplement: NIHMS710198-supplement-3.pdf [file NIHMS710198-supplement-3.pdf]

# Supplementary Figure 6

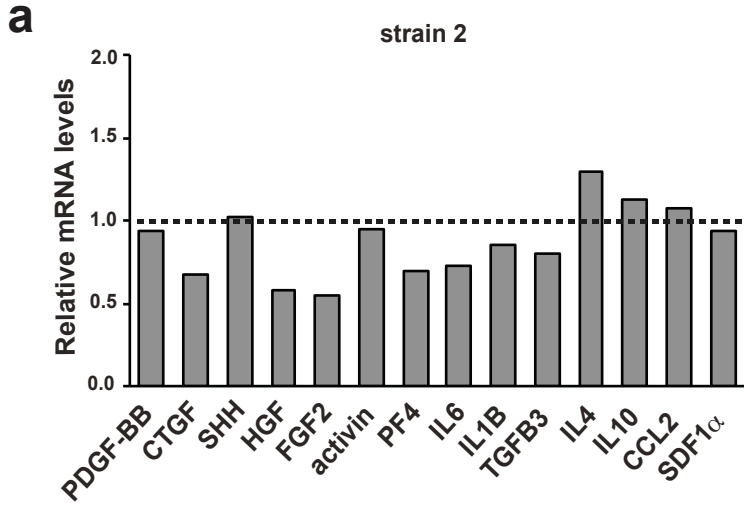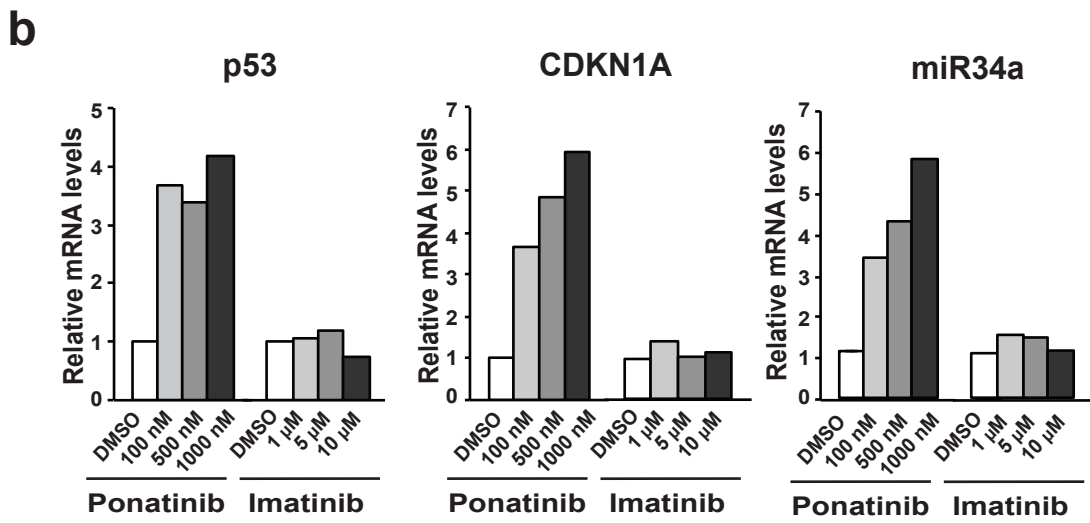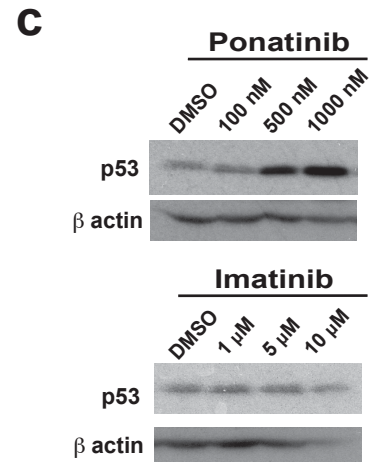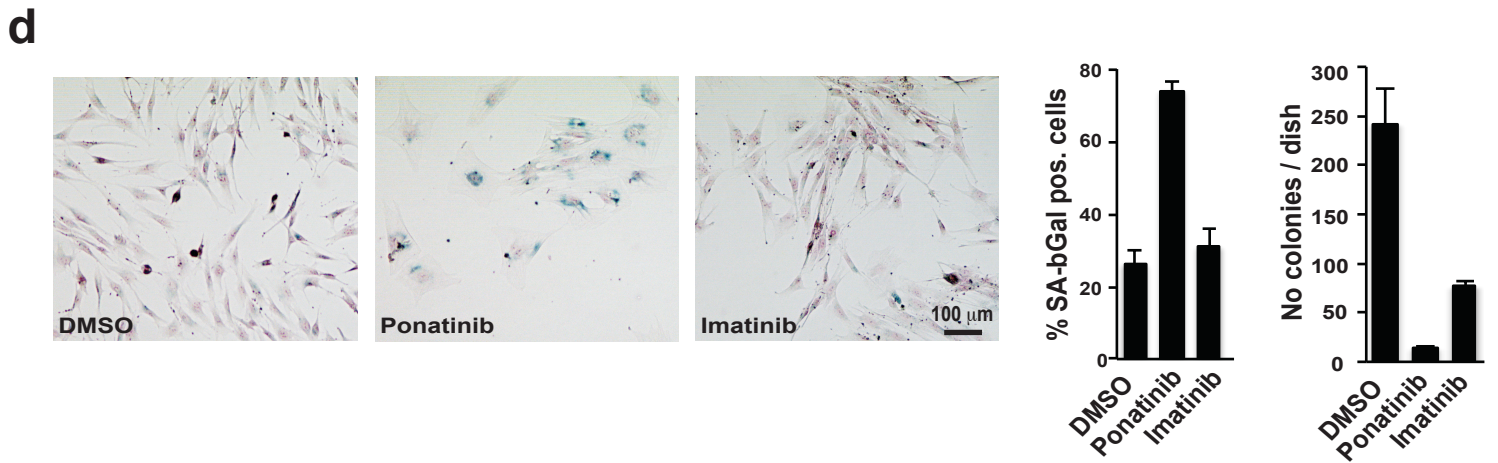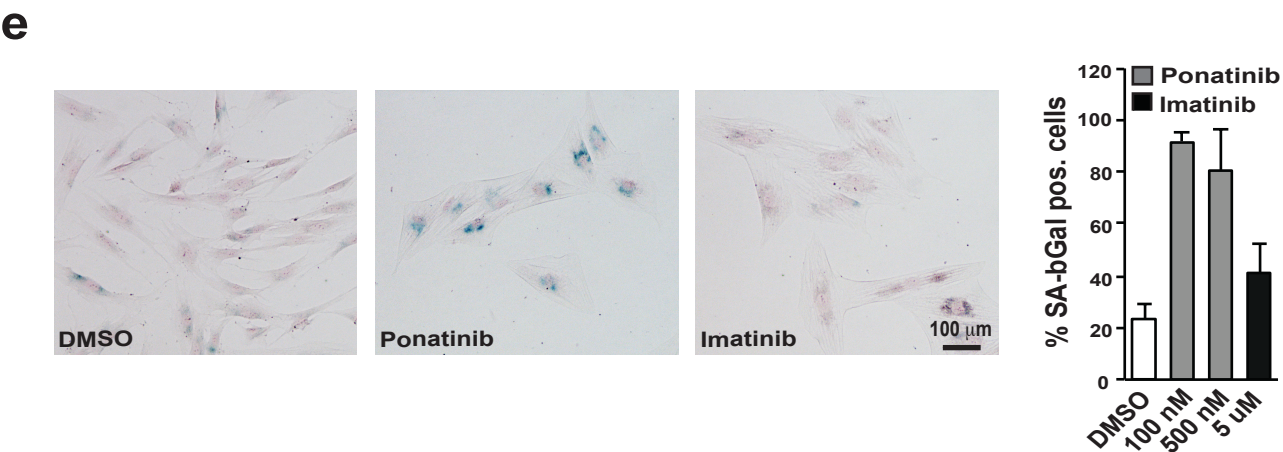

Supplement: NIHMS710198-supplement-6.pdf [file NIHMS710198-supplement-6.pdf]

# Supplementary Figure 8

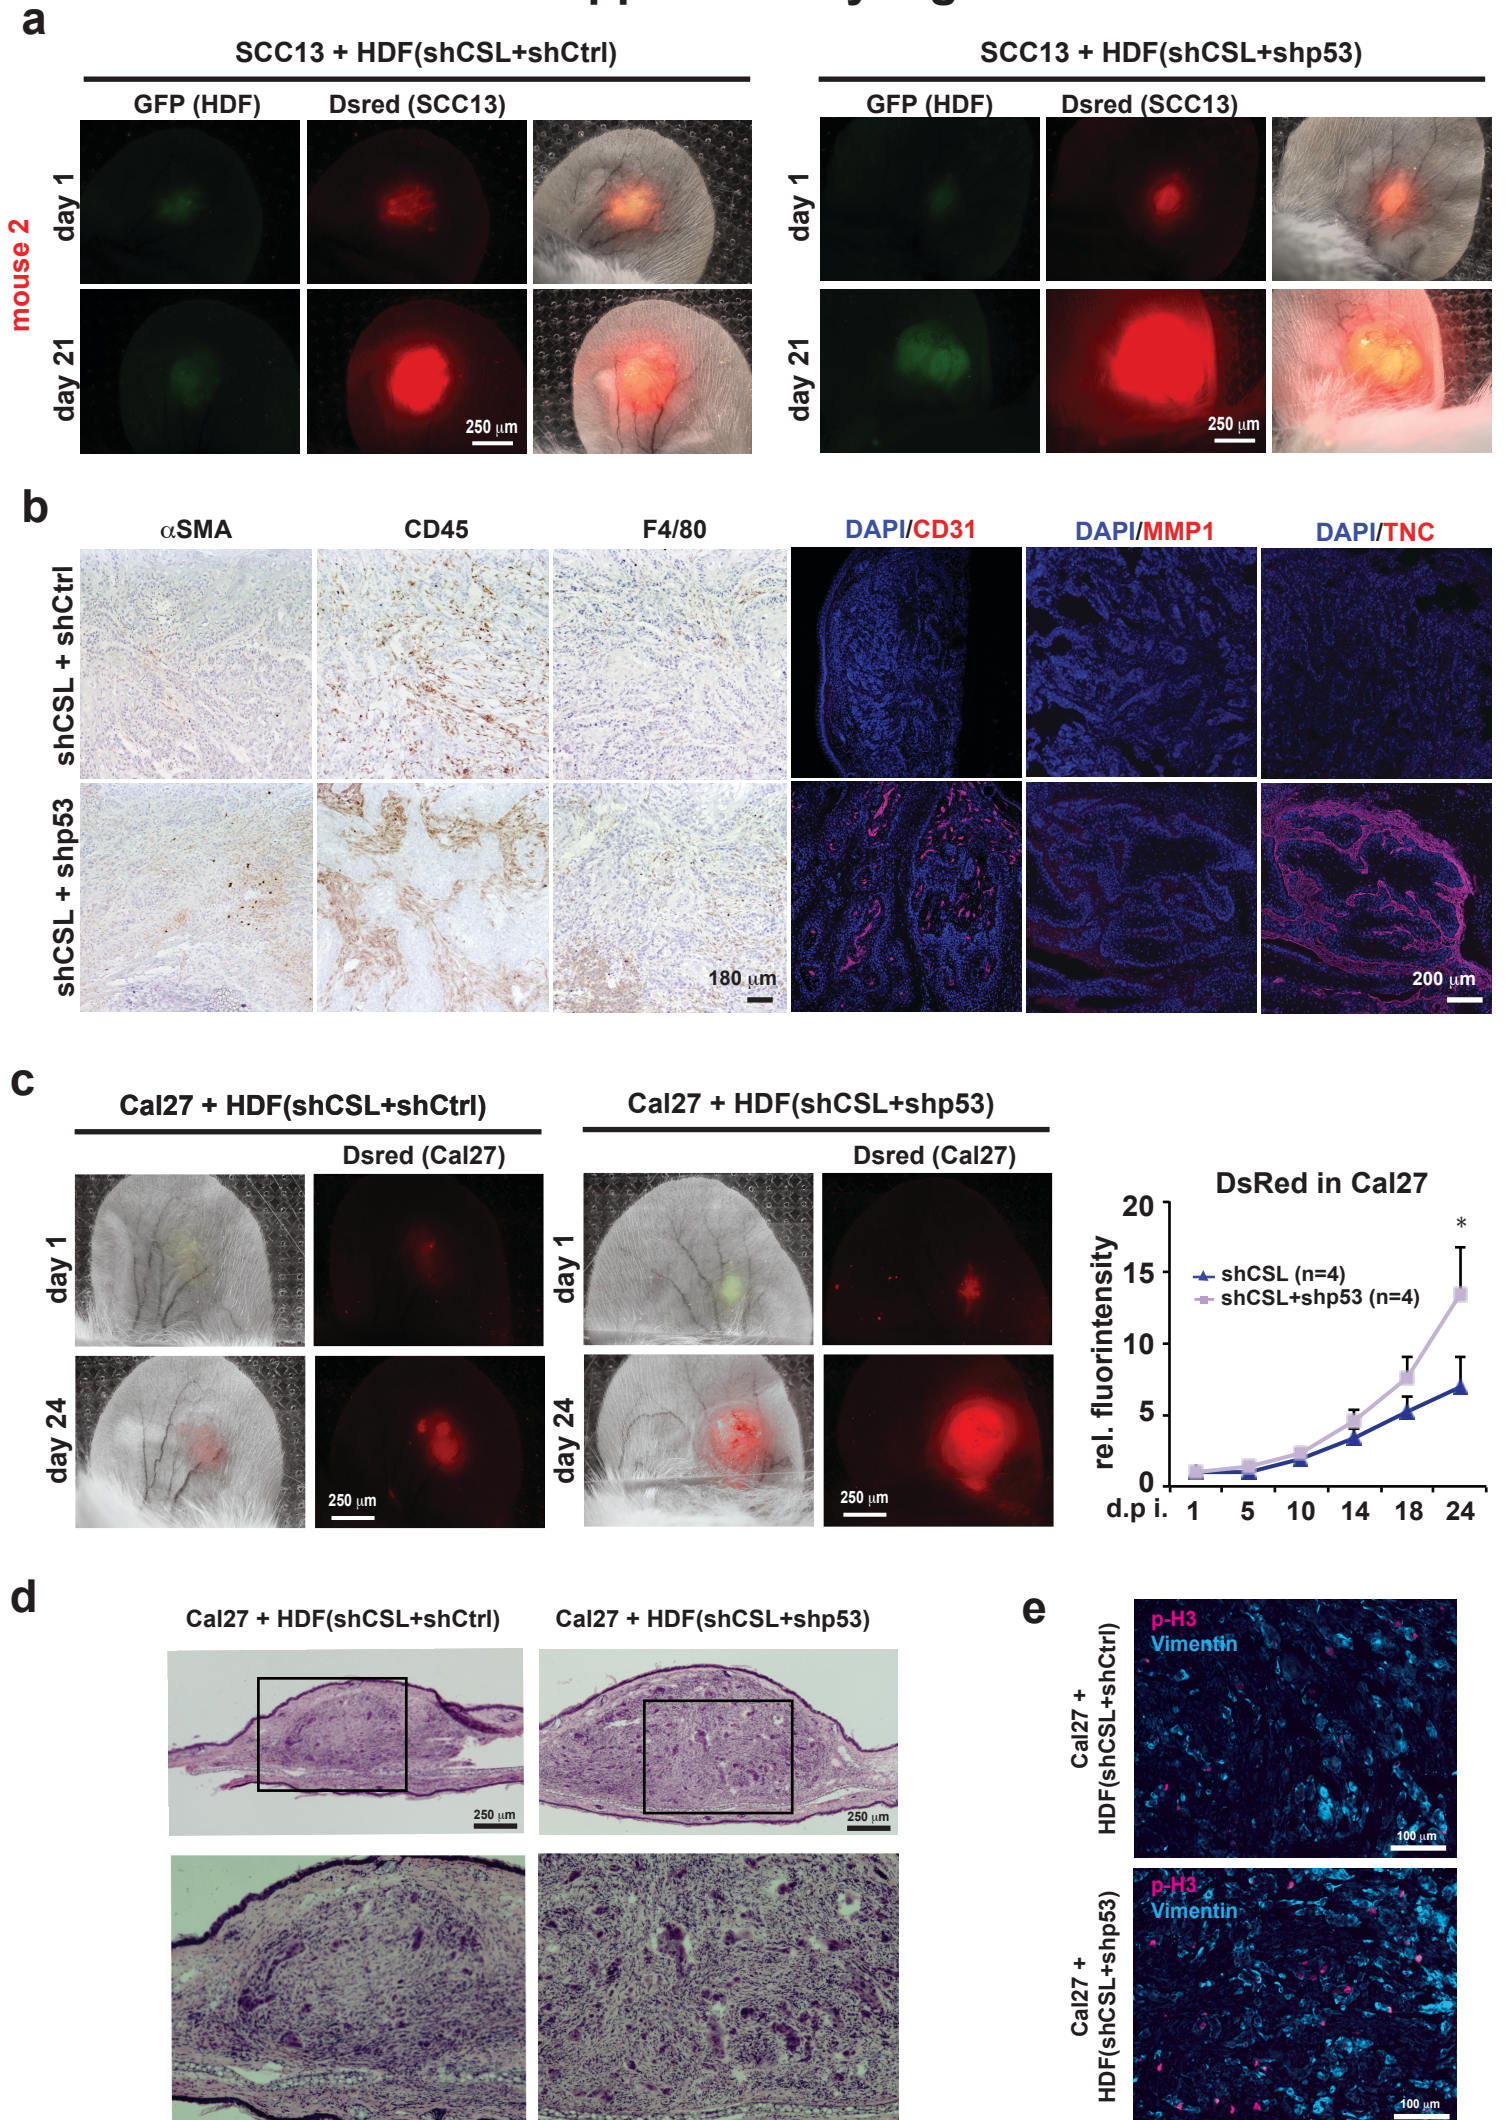

Supplement: NIHMS710198-supplement-8.pdf [file NIHMS710198-supplement-8.pdf]

# Supplementary Figure 9

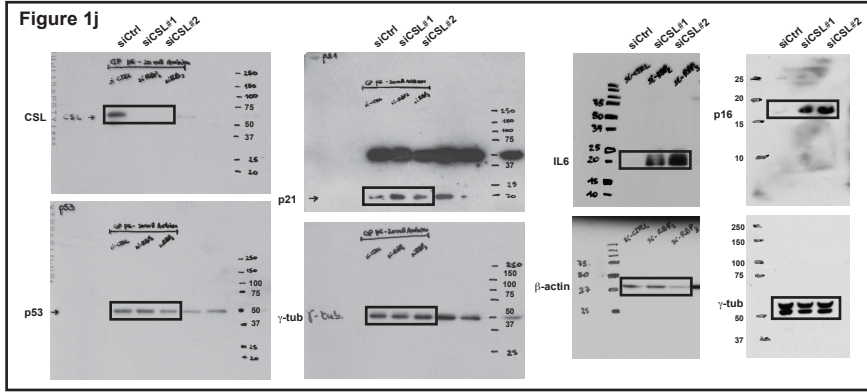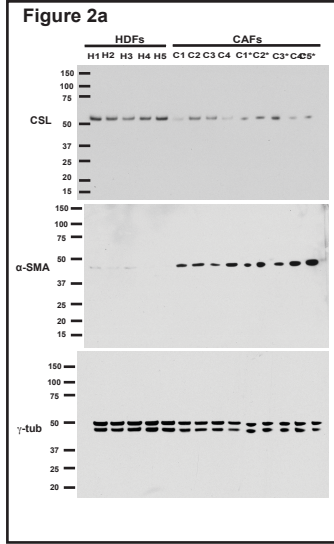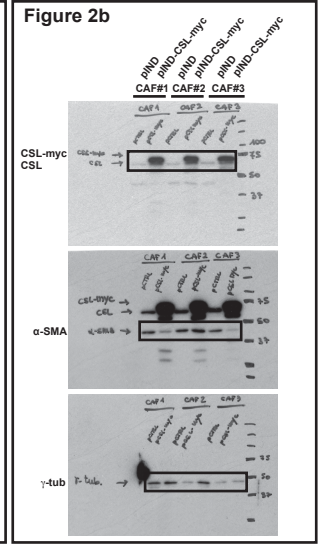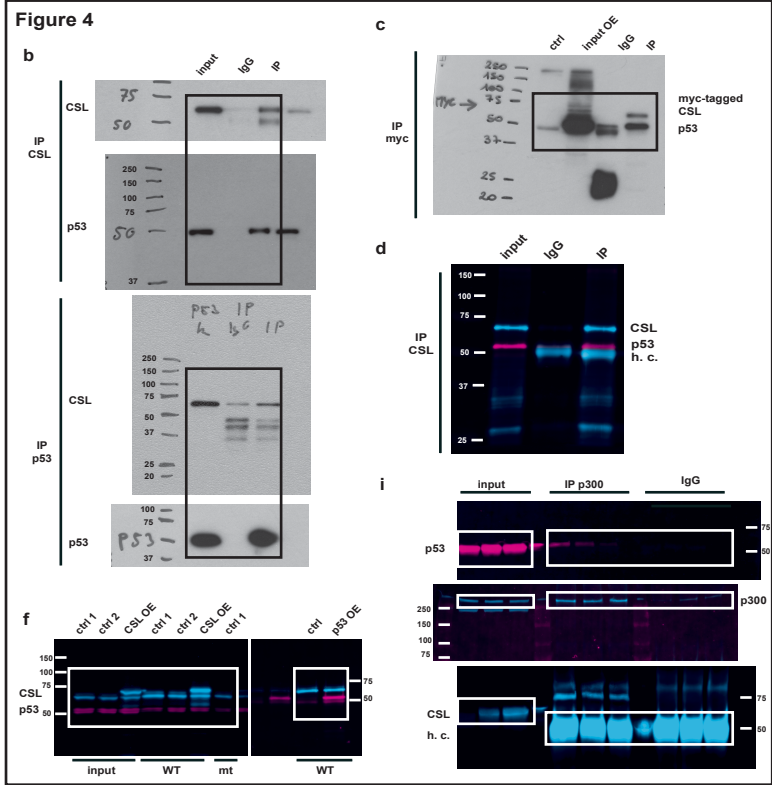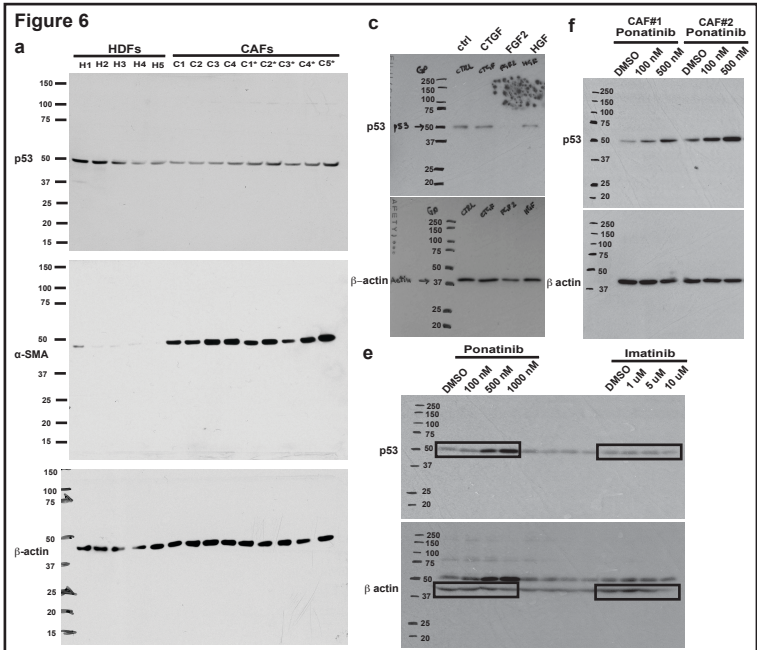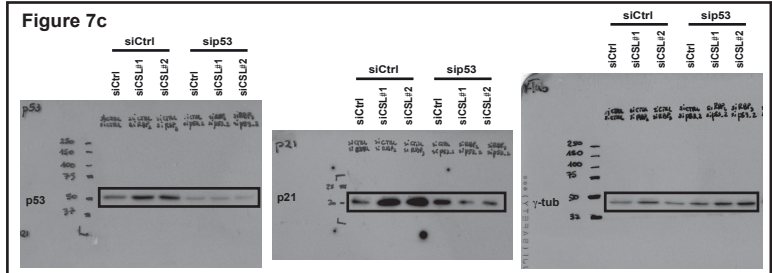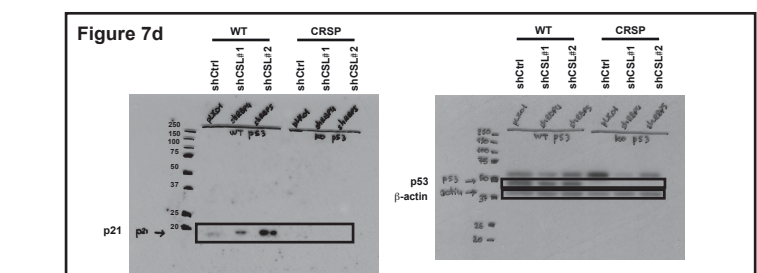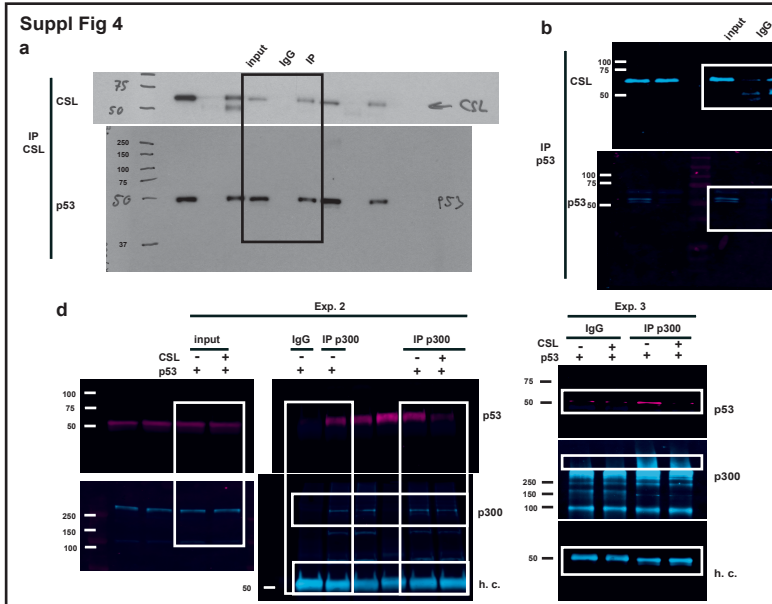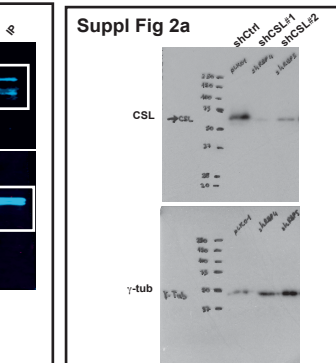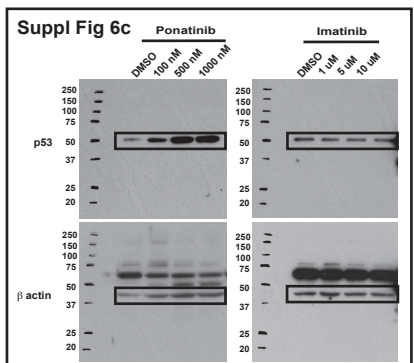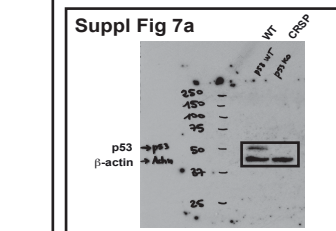

Supplement: NIHMS710198-supplement-9.pdf [file NIHMS710198-supplement-9.pdf]
